# Supplementary material
Source: Springer Nature journal article supplement (https://www.springermedizin.de/resource/supplementary/12916_2012_691_MOESM1_ESM.pdf/9598376)

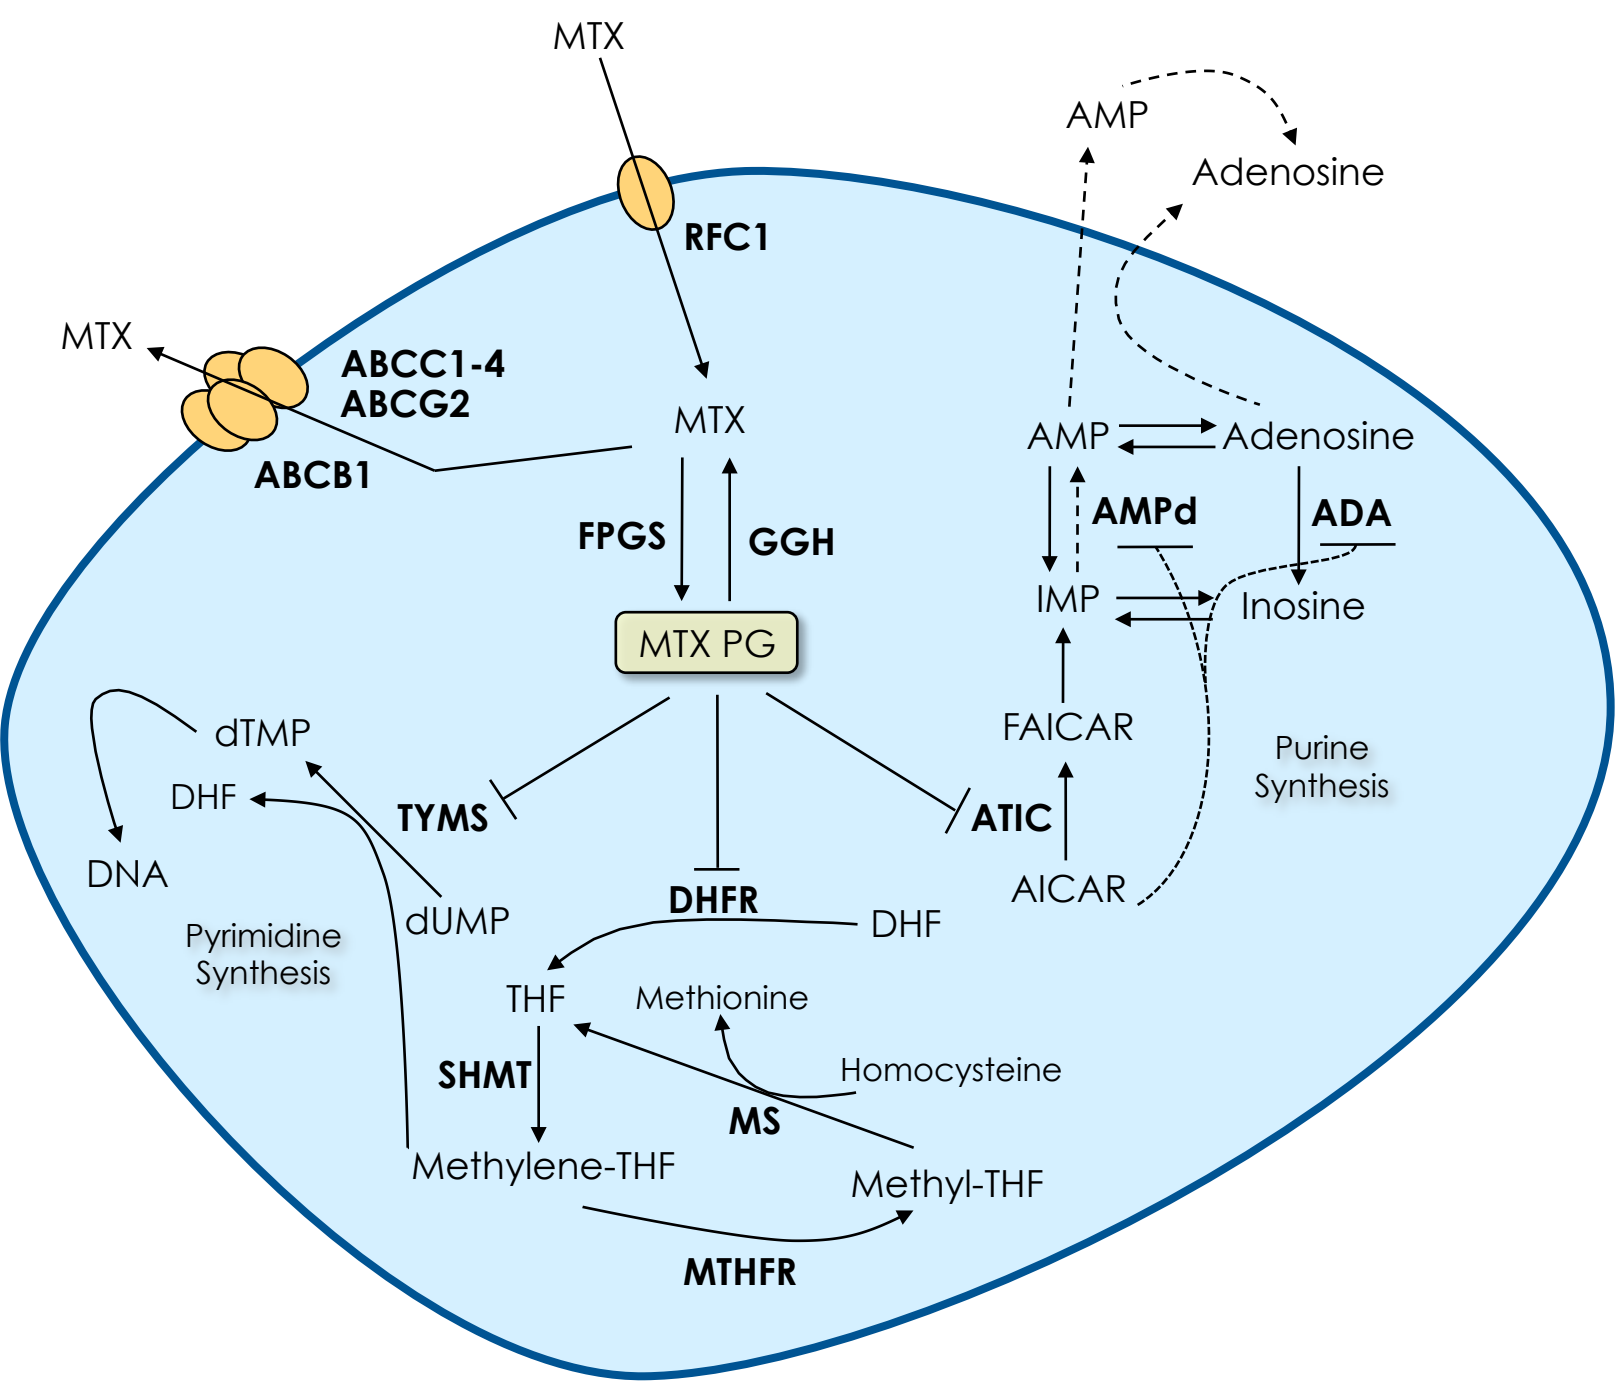

Supplement: MOESM1 [file 9598376]
